**Title:** Atmospheric CO<sub>2</sub> availability does not equate to increased nodularin production in diazotrophic cyanobacteria, but does induce varying responses in net photosynthesis and N<sub>2</sub> fixation rates.

**Running head:** Cyanobacterial toxin production with eCO<sub>2</sub>.

Nicola Wannicke<sup>2,3</sup>, and Michelle M. Gehringer<sup>1\*</sup>

<sup>1</sup>Department of Plant Ecology and Systematics, Technical University of Kaiserslautern, Germany.

<sup>2</sup> Leibniz-Institute for Baltic Sea Research, Rostock, Germany

<sup>3</sup> Leibniz-Institute for Plasma Science and Technology, Greifswald, Germany

\*Corresponding author: Michelle M. Gehringer, Department of Plant Ecology and Systematics, Technical University of Kaiserslautern, Gottlieb-Daimler Str., 67663 Kaiserslautern, Germany.

Email: [mmgehringer@yahoo.com](mailto:mmgehringer@yahoo.com) & [mgehring@rhrk.uni-kl.de](mailto:mgehring@rhrk.uni-kl.de)

Tel: +49 (0)631 205 2362.

**Keywords:** nodularin, *Nodularia*, *Nostoc*, climate change, net photosynthesis, nitrogen fixation.

**Primary Research Article**

## Abstract

Increasing levels of CO<sub>2</sub> in the atmosphere are suggested to favour increased incidences of cyanobacterial blooms in water bodies, with a potential concomitant increase in toxin production. As nitrogen fixing cyanobacteria are independent of nitrate and ammonium, this pilot study investigated whether elevated atmospheric CO<sub>2</sub> levels (eCO<sub>2</sub>), could increase toxin production and net photosynthesis (NP) rates in both terrestrial and aquatic diazotrophic cyanobacteria. Both toxin and non-toxin producing strains of *Nostoc* and *Nodularia* were grown at present atmospheric levels (PAL) of CO<sub>2</sub> or near future elevated (eCO<sub>2</sub>) and net photosynthesis (NP) determined. Short term responses demonstrated CO<sub>2</sub> associated increases and decreases in NP, with *N. harveyana* SAG44.85 showing little change in its NP at eCO<sub>2</sub>. Long term responses recorded increases in NP for all species in response to eCO<sub>2</sub>, except for *N. harveyana* on day 7. Nitrogen fixation rates were significantly higher by approx. 10 fold in the aquatic *Nodularia* species compared to the terrestrial *Nostoc* species tested. Moreover, nitrogen fixation rates were not significantly higher at eCO<sub>2</sub>, except for *N. harveyana*. There was no direct correlation between increased nodularin production and eCO<sub>2</sub> in neither aquatic, nor terrestrial nodularin producing species, however there was a significant correlation between nodularin content and POC:PON ratio for the terrestrial *Nostoc* sp. 73.1 not observed for the aquatic *Nodularia spumigena* CCY9414.

## Introduction

Cyanobacteria in their role as primary producers form an essential part of the global C and N cycles, both in terrestrial and aquatic environments. The process of oxidative photosynthesis, whereby CO<sub>2</sub> fixation is powered through the splitting water, energised by sunlight, is thought to have evolved during the Archean era when there was no free oxygen in the Earth's atmosphere (Lyons *et al.*, 2014). Cyanobacteria are attributed with oxygenation of the Earth's atmosphere around 2.33 Ga during a period known as the great Oxygenation Event (GOE), marking the end of the Archean era (Lyons *et al.*, 2014). Phylogenetic studies indicate that all cyanobacterial photosystem II reaction centre D1 proteins evolved before the last common ancestor of cyanobacteria (Cardona *et al.*, 2015), currently positioned at approximately 2.7 Ga (Sanchez-Baracaldo, 2015), indicating that photochemical splitting of water was possible before the GOE. Levels of atmospheric CO<sub>2</sub> are thought to have been in the range of 5 – 10× present atmospheric levels (PAL) during the late Archean meaning that oxidative photosynthesis evolved under atmospheric CO<sub>2</sub> levels similar to those proposed under worst case scenario climate change models ~ 2000 ppm. Dating the origin of N<sub>2</sub> fixation is more complicated but the molybdenum based nitrogenase was recently placed in the last universal common ancestor (LUCA), before cyanobacteria evolved (Weiss *et al.*, 2016).

The enzyme catalysing CO<sub>2</sub> fixation in Cyanobacteria and modern-day C<sub>3</sub> plants is ribulose-1,5-bisphosphate carboxylase/oxygenase (Rubisco), thought to be the most abundant enzyme on Earth. Rubisco binds CO<sub>2</sub> and generates 2 molecules of 3-phosphoglycerate (3PGA) which is further processed in the Calvin-Benson-Bassham (CBB) cycle to produce ribulose-1,5-bisphosphate, Rubisco's CO<sub>2</sub> acceptor molecule, and glutamate. In order to reduce undesirable oxygenase activity, cyanobacteria have evolved the carbon concentrating mechanism (CCM) to increase the effective concentration of CO<sub>2</sub> around the Rubisco active site by up to 1000-fold (Price, 2011). The increased growth rates observed for *Trichodesmium* cultures growing under 900 ppm CO<sub>2</sub> were ascribed to down regulation of the CCM, thereby reducing the energy demands on the cell (Kranz *et al.*, 2011). In contrast, biological soil crusts showed a decrease in cyanobacterial abundance when grown under eCO<sub>2</sub> for 10 years, suggesting a

negative impact of climate change on arid soil crusts (Steven *et al.*, 2012). The ability of cyanobacterial soil crusts to increase NP under eCO<sub>2</sub> exposure is dependent on water availability (Lane *et al.*, 2013).

Approximately a third of all anthropogenic CO<sub>2</sub> released dissolves in the oceans, reducing the pH by increasing the partial pressure of CO<sub>2</sub>. Oxidative photosynthetic organisms that rely on the construction of a carbon concentrating mechanism (CCM) are thought to be sensitive to changes in pCO<sub>2</sub> (Shi *et al.*, 2012). Decreasing the medium pH reduced N<sub>2</sub> fixation rates in *Trichodesmium*, an important cyanobacterial, non-heterocystous marine diazotroph, under Fe- limiting conditions. The reduced N<sub>2</sub> fixation rates corresponded to reduced nitrogenase efficiency at lower pH. Exposing cultures of *Nostoc muscorum* to raised HCO<sub>3</sub><sup>-</sup> concentrations under diazotrophic conditions resulted in enhanced growth, O<sub>2</sub> and pigment production and nitrogenase activities (Bhargava *et al.*, 2013). *Nodularia spumigena* KAC12 grown at eCO<sub>2</sub> of 960 ppm showed increased photochemical yield after 5 days (Karlberg & Wulff, 2013), suggesting higher potential NP rates. *Nodularia spumigena* CCY9414 grown under elevated CO<sub>2</sub> conditions (548 ppm) exhibited increased C fixation rates compared to control cultures, with increased carbon to nitrogen (POC:PON) and nitrogen to phosphate ratios recorded (Wannicke *et al.*, 2012). Higher carbon to nutrient ratios were also observed in *Synechocystis* PCC6803 cultures grown at eCO<sub>2</sub> (Verschoor *et al.*, 2013). Only a slight increase was observed in C:N ratios in 3 strains of cyanobacteria grown at eCO<sub>2</sub> in continuous culture in bubble reactors, namely *Cyanothece* ATCC51142, *Nodularia spumigena* IOW-2000/1 and *Calothrix rhizosoeniae* SC01 (Eichner *et al.*, 2014). This excellent study emphasised the need to generate more data on N<sub>2</sub> fixation responses in heterocystous cyanobacteria in response to eCO<sub>2</sub> levels, and highlighted the diversity of responses in marine species to eCO<sub>2</sub> of approx. 900 ppm.

Given their evolutionary history under raised CO<sub>2</sub> levels, researchers (Gehring & Wannicke, 2014, Sandrini *et al.*, 2016, Visser *et al.*, 2016) have voiced concerns for increased bloom occurrence and toxin production under the elevated levels of CO<sub>2</sub> proposed by current climate change scenarios. Particularly toxin producing strains capable of fixing their own N<sub>2</sub> from the atmosphere offer the biggest threat to

human safety, as they would have little nutrient limitations restricting growth (Wannicke *et al.*, 2012). The most commonly occurring cyanobacterial toxins are microcystin and nodularin, both strong protein phosphatase inhibitors, capable of inducing extensive hepatocellular bleeding and collapse in exposed individuals and animals (Gehring, 2004). The levels of toxin production within cyanobacterial blooms is largely determined by several abiotic factors such as light intensity and quality, pH and nutrient availability (Reviewed by Neilan *et al.*, 2013; Gehring & Wannicke, 2014; Visser *et al.*, 2016). Raised temperatures and elevated CO<sub>2</sub> levels in the range of those proposed under climate change, are linked to increased primary production (Paerl & Huisman, 2009) and toxin production by cyanobacteria (El-Shehawey *et al.*, 2012, Kleinteich *et al.*, 2012). Increased production of the secondary metabolite microcystin is linked to maintaining the C:N balance in the cell (Downing *et al.*, 2005) particularly when N uptake exceeds the relative growth rate. Elevated CO<sub>2</sub> levels have the capacity to significantly affect the community composition and toxicity of *Microcystis* blooms (Liu *et al.*, 2016; Van De Waal *et al.*, 2011). Microcystin synthesis requires active photosynthesis (Sevilla *et al.*, 2012) and is regulated by the global N uptake regulator, NtcA, supporting the proposed importance of the C:N balance on toxin production. This agrees with observed anthropogenically alterations in the N/P ratio resulting in the appearance of cyanobacterial blooms (Beverdors *et al.*, 2013) and increased toxin production (Horst *et al.*, 2014). N limitation is thought to induce a shift to N<sub>2</sub> fixing, diazotrophic cyanobacteria, thereby increasing organic N availability and a subsequent increase in toxin production (Posch *et al.*, 2012, Gehring & Wannicke, 2014).

Dense cyanobacterial blooms require excessive CO<sub>2</sub> to support their continued growth (Paerl & Huisman, 2009) with CO<sub>2</sub> availability often limiting bloom growth, a restriction that could be removed under increased atmospheric CO<sub>2</sub> levels. Only aquatic cyanobacterial strains carrying the high flux, low affinity HCO<sub>3</sub><sup>-</sup> receptor were able to benefit from eCO<sub>2</sub> levels and increase their growth rates (Sandrini *et al.*, 2015, Sandrini *et al.*, 2016, Visser *et al.*, 2016). At the time of our review (Gehring & Wannicke, 2014) most eCO<sub>2</sub> studies had focused on the freshwater unicellular non-diazotrophic *Microcystis aeruginosa*

species, with only a couple investigating diazotrophs. Subsequently, we decided to conduct a pilot study on diazotrophic cyanobacterial species from both terrestrial and aquatic environments to investigate the effect of eCO<sub>2</sub> levels on NP, N<sub>2</sub> fixation rates and toxin production.

## Materials and methods:

### Cultures and culture conditions

Terrestrial diazotrophs *Nostoc* spp. 73.1, 40.5, 65.1 and C1.8 were grown on BG11 medium or nitrogen free medium, BG11<sub>0</sub> medium with ferric ammonium citrate replaced with ferric citrate (Gehring *et al.*, 2010). The aquatic diazotrophic *Nodularia* species *Nodularia spumigena* CCY9414 (Culture Collection Yerseke) and the benthic *Nodularia harveyana* SAG44.85 (Culture Collection of Algae, SAG, Georg August University, Göttingen) were cultivated in nitrogen free F/2 medium (UTEX, Austin) containing vitamins, with *N. harveyana* requiring the addition of 5 ml l<sup>-1</sup> of soil extract. *Nostoc* sp. 73.1, *Nostoc* sp. 65.1 (Gehring *et al.*, 2012) and *Nodularia spumigena* CCY9414 (Voss *et al.*, 2013) produce nodularin.

The experimental flow is illustrated in Supplementary Figure 1. Fifty ml of stationary phase cultures were inoculated into 150 ml of the appropriate media in a glass rim culture flask (Duran, 45 mm dia.) and placed at the control or experimental conditions for 14 days (acclimation phase). The inoculum cultures were then diluted 1:1 with fresh medium and divided into two ventilated T<sub>175</sub> polystyrene cell culture flasks (Greiner) and laid flat to ensure an even light exposure and maximise gas exchange. Doing the experiments in duplicate permitted the investigation of more diazotrophic species and conditions during this pilot study. Experimental cultures were exposed to eCO<sub>2</sub> of 2000 ppm, 10:14 hr light:dark cycle, 22 °C / 18 °C light:dark, 60% humidity and 130 μmol photons m<sup>-2</sup> s<sup>-1</sup> (Percival chamber). Control cultures were exposed to CO<sub>2</sub> at PAL (440 ppm in Kaiserslautern, Germany), 10:14 hr light:dark cycle, 22 °C, 60% humidity and 130 μmol photons m<sup>-2</sup> s<sup>-1</sup> (Osram L58 daylight bulb, W77).

## Gas exchange measurements, chlorophyll and toxin extraction

Culture material was removed by pipetting under sterile conditions in a clean bench in PAL CO<sub>2</sub> conditions on days 7 (exponential growth phase) and 14 (stationary phase). Harvested bacteria were filtered onto a 3 µM SSWP glass fibre filter (Millipore), placed onto an appropriate, moist agar plate and incubated under experimental conditions until net photosynthesis (NP) determinations (between 1 to 4 hours after sampling) by means of CO<sub>2</sub> gas exchange (GFS 3000, WALZ, Effeltrich, Germany). Bacterial covered filters were placed in the sample cuvette and NP determined at 80% humidity first at PAL for control cultures (C<sub>amb</sub>) and then 1000 ppm CO<sub>2</sub> (C<sub>high</sub>). Cultures treated at eCO<sub>2</sub> levels were first measured at 1000 ppm CO<sub>2</sub> (T<sub>high</sub>) and then PAL (T<sub>amb</sub>). The respiration rate was determined for each filter after 5 min dark incubation at the start and end of the measuring period to ensure the cultures were not stressed. CO<sub>2</sub> assimilation rates were determined at 50, 130 and 500 (light saturation point) µmol photons m<sup>-2</sup> s<sup>-1</sup>, and expressed per µg chlorophyll *a*. Responses of net photosynthesis to eCO<sub>2</sub> levels have been split into 2 categories (Suppl. Fig. 1)– short term responses to immediate changes in CO<sub>2</sub> availability for days 7 and 14 (C<sub>high</sub> versus C<sub>amb</sub>) and (T<sub>high</sub> versus T<sub>amb</sub>), as well as long term responses for days 7 and 14 (C<sub>amb</sub> versus T<sub>high</sub>) measured after 14 days growth under elevated CO<sub>2</sub>. Data for one replicate of *Nostoc* 40.5 grown at eCO<sub>2</sub> on day 14 indicated that the sample was stressed and it was also excluded from the analysis (T<sub>amb</sub> & T<sub>high</sub>), while the readings for C<sub>high</sub> for *N. spumigena* CCY9414 on day 7 were erratic and excluded from our calculations.

A combined protocol for chlorophyll *a* determination and toxin extraction from the bacterial filter discs was employed. After NP measurements, each filter was placed in a 2 ml centrifuge tube containing 100 mg beads (0.1 mm zirconia silica beads, BioSpec) to which 1.5 ml 90% HPLC grade methanol was added (Meeks & Castenholz, 1971). The samples were bead-beated (Retch) for 1 min at 30 beats per min and incubated at room temperature in the dark overnight. Samples were subsequently centrifuged at 10 000 rpm for 5 minutes at 20°C and the OD<sub>665</sub> of the SNF determined (Lambda 35 UV/VIS spectrometer, Perkin-Elmer). Chlorophyll *a* content was calculated using the equation: Chl *a* µg ml<sup>-1</sup> = OD<sub>665</sub> × 12.7

(Meeks & Castenholz, 1971). The SNF was then stored in a new 2 ml centrifuge tube at  $-20^{\circ}\text{C}$ . The above protocol was repeated with 1 ml of 70% HPLC grade methanol to complete toxin extraction (Gehring *et al.*, 2012). Two hundred microliters of a 1:1 mixture of the 90% and 70% methanol extracts were used in a competitive ELISA assay (Beacon Analytical Systems Inc., Portland, ME, USA) following the manufacturer's instructions. The amount of toxin extracted from each bacterial filter was calculated from the standard curve and expressed as ng nodularin  $\mu\text{g Chl a}^{-1}$ .

### **Stable isotope and $\text{N}_2$ fixation**

Stable N isotope ratios ( $\delta^{15}\text{N-PON}$ ) as well as PON and POC concentrations were measured for both *Nodularia* samples and *Nostoc* sp. 73.1 grown in N-free medium on day 14 by means of flash combustion in a Carlo Erba EA 1108 at  $1020^{\circ}\text{C}$  in a Thermo Finnigan Delta S mass-spectrometer. Filters containing culture samples were trimmed, sectioned, then loaded into tin capsules and palletised for isotopic analysis. The stable N isotope ratios measured for each sample were corrected against the values obtained from standards with defined nitrogen and carbon isotopic compositions (IAEA-N1, IAEA-N2, NBS 22, and IAEA-CH-6) by mass balance. Values are reported relative to atmospheric  $\text{N}_2$  ( $\delta^{15}\text{N}$ ). The analytical precision for both stable isotope ratios was  $\pm 0.2\%$ . Calibration material for N analysis was acetanilide (Merck).  $\text{N}_2$  fixation activity was measured by incubating cultures with bubble addition of  $^{15}\text{N-N}_2$  enriched gas for 24 hours, guaranteeing sufficient dissolution of the  $^{15}\text{N}$  gas in the incubation bottle (Mohr *et al.*, 2010). Tracer incubations were terminated by gentle vacuum filtration ( $<200$  mbar) of the culture material through pre-combusted GF/F filters (Whatman) that were then dried at  $60^{\circ}\text{C}$ , analysed and the  $\text{N}_2$  fixation rates calculated (Montoya *et al.*, 1996).

### **Carbonate Chemistry**

The pH was determined on day 14 from sample filtrates using an electrode (Radiometer analytical PHM210, France) calibrated with a three point calibration using NBS (National Bureau of Standards) buffers giving values of pH relative to the NBS scale. Total alkalinity ( $A_T$ ) was determined using the



colorimetric SOMMA system according to Johnson et al. (1993). The system was calibrated with carbon reference material provided by A. Dickson (University of California, San Diego) and yielded a precision of about  $\pm 2 \mu\text{mol kg}^{-1}$ . Total carbon ( $C_T$ ) and  $p\text{CO}_2$  in the media were calculated using CO2SYS (Lewis et al., 1998).

### **Statistical analysis**

Statistical analyses were done by using repeated measures ANOVA to determine the  $\text{CO}_2$  treatment effect and the effect of sampling time on the short-term response of C assimilation. Furthermore, we applied Spearman's rank correlation to test for dependencies in between experimental parameters. Additionally, Mann-Whitney Rank Sum Test was applied when comparing NP and respiration rates between  $e\text{CO}_2$  treatments and PAL controls. Prior to ANOVA and correlation analysis, data were tested for normality and homogeneity of variances using Wilk-Shapiro and Levene's tests. All analyses were performed using the software SPSS 22.0.

## **Results**

### **Carbonate Chemistry**

Carbonate chemistry confirmed that our experimental application of a continuous gas supply ensured culture growth at elevated  $\text{CO}_2$  levels. The  $p\text{CO}_2$  in the media of cultures grown at 2000 ppm was determined to be in the range of  $1987 \mu\text{atm}$  for BG11<sub>0</sub> and  $1701 \mu\text{atm}$  for F/2 medium (Suppl. Table 1).

### **Net photosynthesis**

#### **Growth phase response**

When considering net photosynthesis rates measured under the growth conditions of PAL and  $e\text{CO}_2$ , only *N. harveyana* SAG44.85 grown at PAL displayed an incubation time effect with net photosynthesis higher on day 7 (exponential phase), compared to early stationary phase on day 14. Differences between

the two sampling days in all other cultures were observed, nevertheless, a repeated measure ANOVA with time as a predictor for combinations of growth and treatment CO<sub>2</sub> revealed a significant time effect in *N.spumigena* at PAL (higher rates at day 14) and for *Nostoc* sp. C1.8 (higher at day 14) and *Nostoc* sp. 73.1 (higher at day 7) (with DIN addition) at eCO<sub>2</sub> (Suppl. Table 2).

During exponential growth at day 7, nitrogen availability (addition of nitrate) seemed to have no effect on NP in *Nostoc* C1.8 and *Nostoc* sp. 73.1 at PAL growth conditions. At eCO<sub>2</sub>, NP in *Nostoc* C1.8 seemed unaffected by N availability, but appeared higher in *Nostoc* sp. 73.1 cultures with DIN addition. No difference in NP was detected between the *Nodularia* species tested at PAL.

During stationary growth (day 14), N availability had no effect on NP in *Nostoc* C1.8 at PAL, whereas at eCO<sub>2</sub> higher NP was detected in cultures with DIN addition. In *Nostoc* sp. 73.1 no effect of N availability on NP was shown, neither at PAL nor eCO<sub>2</sub>. *Nodularia* species did not display different NP rates at PAL, while at eCO<sub>2</sub> elevated NP was observed in *N. spumigena* compared to *N. harveyana*.

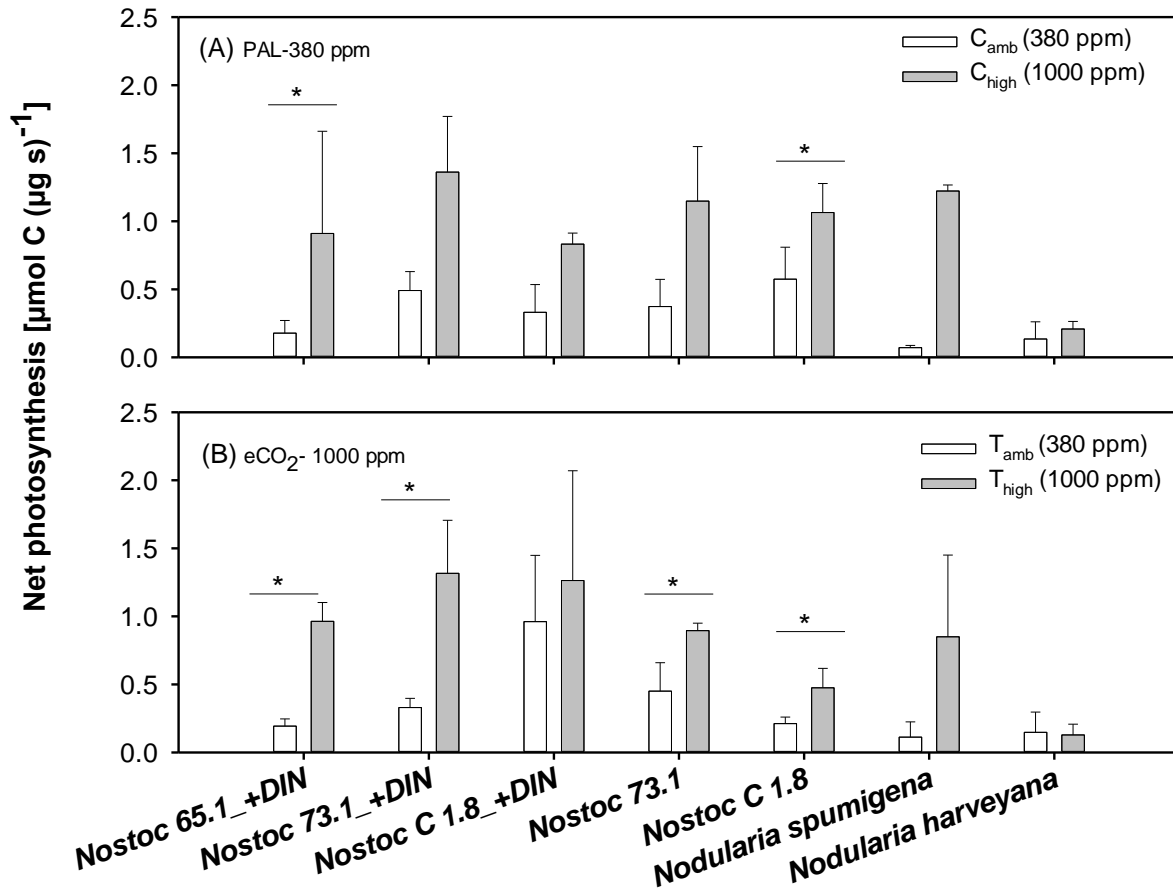

**Figure 1: Short term responses** of net photosynthesis in control cultures (A) grown at PAL (380 ppm) and the treatment (B) grown at eCO<sub>2</sub> (2000 ppm) with NP (C<sub>amb</sub> & T<sub>amb</sub>) measured under PAL (380 ppm, white bars) and eCO<sub>2</sub> (1000 ppm, grey bars) conditions (C<sub>high</sub> & T<sub>high</sub>). Bars represent mean and standard deviation of n=4 (day 7+day 14). Significant differences between measurements are indicated by \* (p<0.05) according to repeated -measure ANOVA and \*\* (p<0.005) (Suppl. Table 2).

### Short term responses to eCO<sub>2</sub>

All control cultures grown and measured at PAL (C<sub>amb</sub>) increased their mean net photosynthesis when presented with 1000 ppm CO<sub>2</sub> in the sample cuvette (C<sub>high</sub>) (Fig. 1A). This short term response is strain dependent and only statistically significant in *Nostoc 65.1* (with DIN present) and *Nostoc sp. C1.8* (without DIN) (Suppl. Table 2). Calculating the logarithmic response ratio of net photosynthesis (NP at C<sub>high</sub>/C<sub>amb</sub>, Supp. Fig. 2A) again reveals an instant increase of eCO<sub>2</sub> on net photosynthesis in almost all

cultures and at both time points, except in *N. harveyana* SAG44.85 at day 7 and most pronounced in *N. spumigena*. In eCO<sub>2</sub> cultures grown at 2000 ppm, net photosynthesis was significantly elevated at high CO<sub>2</sub> short-term treatment in *Nostoc* spp. 65.1 and 73.1 (with DIN), as well as in *Nostoc* spp. 73.1 and C1.8 (without DIN) (Fig. 1B, Suppl. Table 2). The logarithmic response ratio of NP also displays a stimulating effect of eCO<sub>2</sub> on net photosynthesis in all cultures, except *N. harveyana* SAG44.85 (day 7) and was most pronounced in *N. spumigena* CCY9414.

### **Long term responses to eCO<sub>2</sub>**

Increased net photosynthesis rates were observed in all *Nostoc* strains grown under eCO<sub>2</sub> and in the presence of DIN when compared to the PAL control cultures at both logarithmic (day 7) and early stationary phases (day 14), as illustrated using the ln response ratio (Fig. 2). *Nostoc* strains grown without addition of DIN displayed no significant effect of eCO<sub>2</sub> on net photosynthesis. The effect in the *Nodularia* species was different for the two sampling intervals, displaying a stimulation of eCO<sub>2</sub> in the exponential growth phase (day 7) in *N. spumigena* CCY9414 and no effect in the stationary growth phase (day 14). In *N. harveyana* SAG44.85, eCO<sub>2</sub> showed no effect on net photosynthesis at day 7 and a non-significant negative effect at day 14 (Fig. 2).

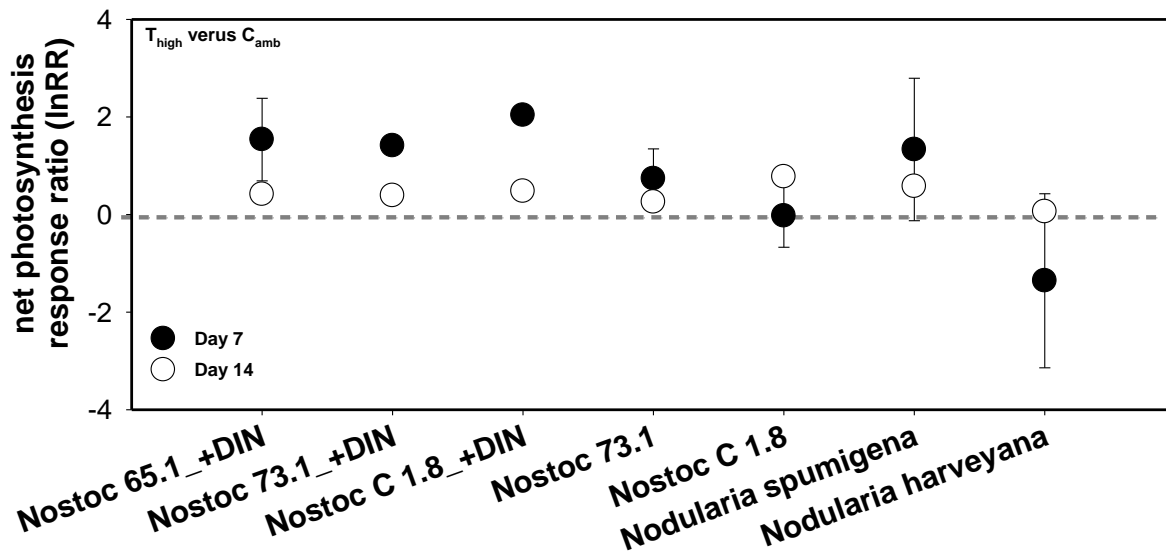

**Figure 2: Long term response** of net photosynthesis (LnRR =natural-log transformed) for the different species tested. LnRR was calculated by dividing net photosynthesis (NP) rate of culture grown at eCO<sub>2</sub> conditions and NP measured at eCO<sub>2</sub> (T<sub>high</sub>) by those of cultures grown at PAL and NP determined at PAL (C<sub>ambient</sub>) conditions. Data is presented as means and 95% confidence interval (CI) of day 7 and day 14, n=2 respectively. The horizontal grey line indicates lack of response to the CO<sub>2</sub> treatment (i.e. LnRR = 0). If the CI crossed the 0 response line, the effect of eCO<sub>2</sub> is considered as non-significant. Mean and CI >0 indicate a stimulation by eCO<sub>2</sub>. Mean and CI <0 indicate a negative effect of eCO<sub>2</sub>.

## Respiration

No significant trend in respiration was detectable on the days sampled, except for *N. spumigena* CCY9414 grown at PAL, where respiration appeared elevated. This increase was not statistically significant (Mann-Whitney Rank Sum Test, t=15, p=0.1, n=4) at the eCO<sub>2</sub> treatment relative to PAL (Suppl. Figure 2). There was however a correlation of dark respiration with chlorophyll *a* content and N<sub>2</sub> fixation rates (positive) (Suppl. Table 3).

## N<sub>2</sub> fixation

N<sub>2</sub> fixation rates in both *Nodularia* species were elevated by approximately tenfold when compared to rates determined for *Nostoc* sp. 73.1 (Fig.3). Moreover, N<sub>2</sub> rates were much higher for *N. harveyana* SAG 44.85 under eCO<sub>2</sub> growth conditions when compared to the control cultures. There was a trend towards elevated N<sub>2</sub> fixation rates in *N. spumigena* as well, but this effect was not statistically significant, as well as the reduced N<sub>2</sub> fixation of *Nostoc* sp. 73.1 at eCO<sub>2</sub> conditions compared to the control PAL. N<sub>2</sub> fixation correlated positively with chlorophyll *a* and PON content and negatively with net photosynthesis (Suppl Table 3).

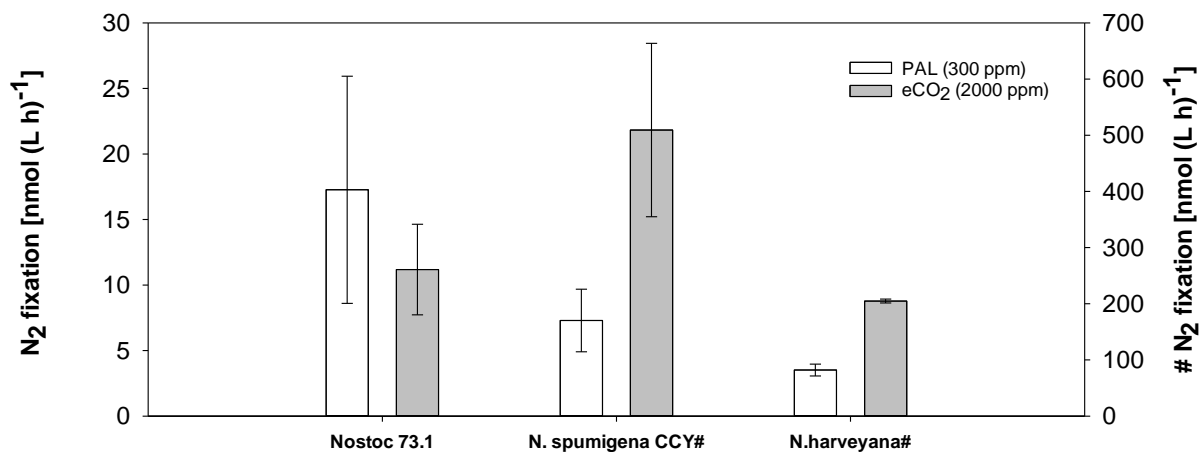

**Figure. 3:** N<sub>2</sub> fixation rates determined for 3 species grown at PAL (white bars) and eCO<sub>2</sub> conditions (grey bars). Bars represent mean and standard deviation of two replicates.

### Intracellular toxins

No statistically significant impact of eCO<sub>2</sub> growth conditions was detected for chlorophyll *a* and volume specific toxin content (Mann-Whitney U test – data not shown, Spearman's Rho, Suppl. Table 3) in *Nostoc* sp. 73.1, *Nostoc* sp. 65.1 and *N. spumigena* CCY9414. Plotting chlorophyll *a* specific nodularin content as a function of N availability in the media showed a tendency for reduced toxin production in *Nostoc* strains grown in N replete medium at eCO<sub>2</sub> when compared to PAL controls (Fig. 1 A). This was

not the case for *N. spumigena* CCY9414 and *Nostoc* sp. 73.1 cultivated in N-free media, in fact the mean toxin production in *Nostoc* sp. 73.1 appeared greater than in the control (Fig. 1A).

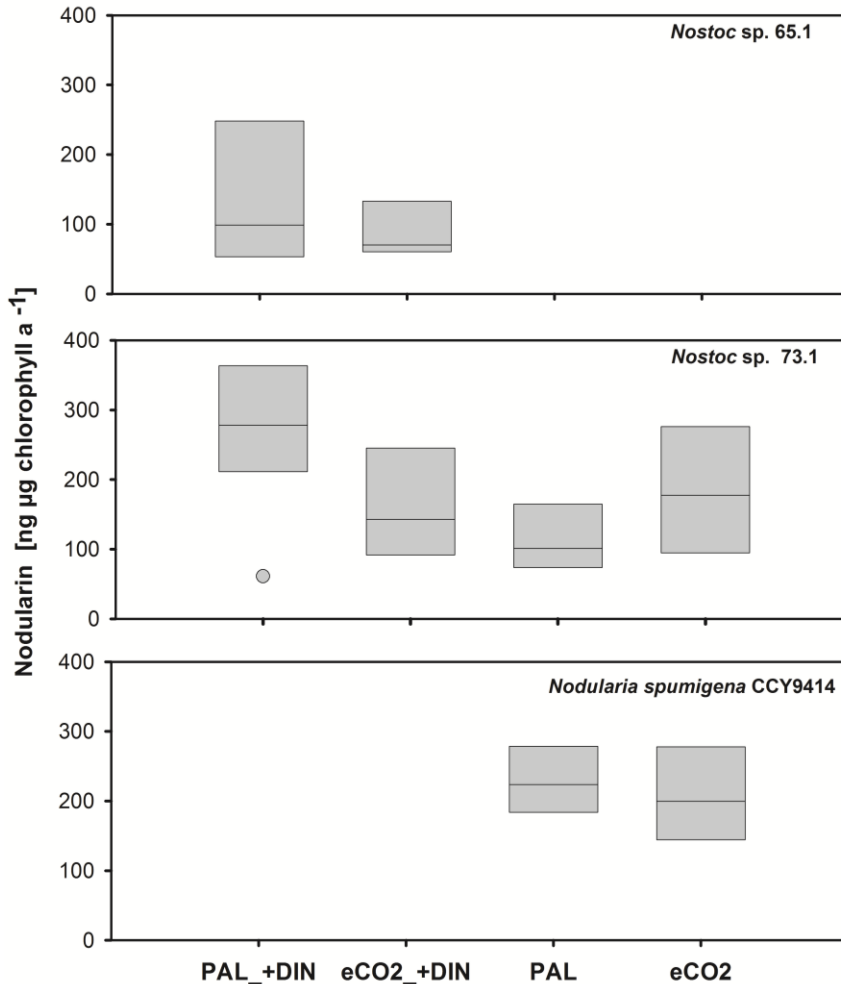

**Figure 4.** Total soluble cellular nodularin content per  $\mu\text{g}$  chlorophyll  $\text{a}^{-1}$  as a function of  $\text{CO}_2$  availability of the three toxin producing diazotrophic cyanobacterial strains investigated. *Nodularia spumigena* CCY9414 was grown in DIN-free F/2 medium, *Nostoc* 65.1 in DIN replete BG11 medium and *Nostoc* 73.1 was grown in BG11 and DIN-free BG110 media. Values represent mean and standard deviation after 7 and 14 days incubation ( $n = 4$ ).

We calculated the biomass specific nodularin response ratio (RR) from nodularin content of cells grown at eCO<sub>2</sub> versus those grown under PAL conditions. Plotting the  $\ln$  RR against the POC:PON ratio (Fig.

5) highlighted a strain response difference between the terrestrial *Nostoc* nodularin producer and the brackish sweater species *Nodularia spumigena* CCY9414 under N-limiting growth conditions, with the terrestrial *Nostoc* sp. 73.1 exhibiting increased toxin production under eCO<sub>2</sub>, accompanied by an increase in the POC:PON. Particulate matter in *Nostoc* sp. 73.1 grown as a N<sub>2</sub> fixer displayed significant higher POC:PON ratios compared to the same strain grown in the presence of nitrate. A significant correlation between chlorophyll *a* specific nodularin content and POC:PON ratio was detected (Spearman's rho= 0.546, p=0.035, n=15, Suppl. Table 3).

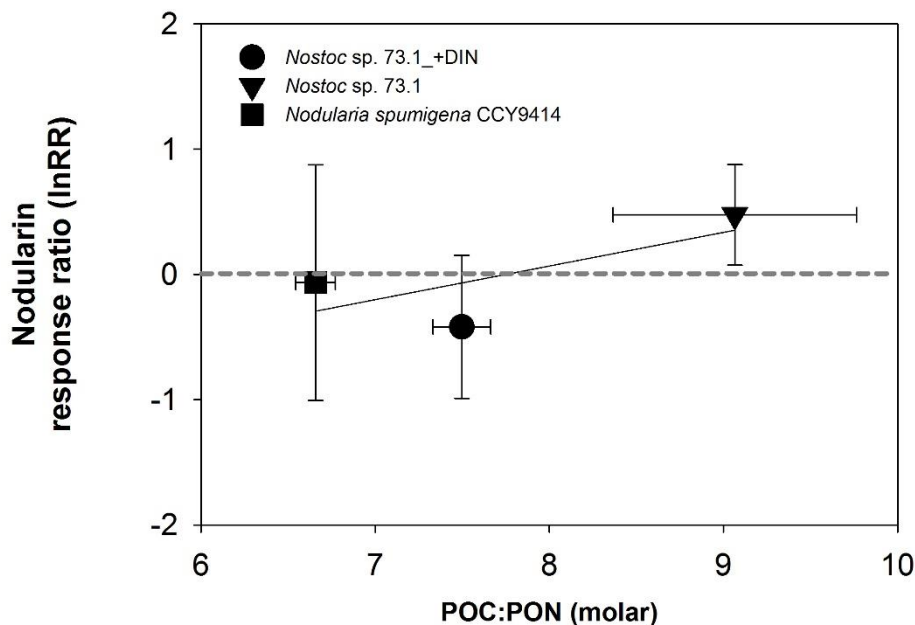

**Figure 5:** Response ratios of chlorophyll *a* specific nodularin as a function of particulate organic carbon and nitrogen stoichiometry (POC:PON) in two strains, *Nodularia spumigena* CCY 9414 and *Nostoc* sp. 73.1 with and without DIN in the growth media. The response ratio represents the natural-log transformed contribution of each nodularin variant at eCO<sub>2</sub> divided by its value at PAL. The horizontal dotted line indicates lack of response (i.e. response ratio = 0), while the bold line indicates linear regressions ( $R^2 = 0.72$ ,  $P = 0.35$ ). Filled squares represent the response ratio of *Nodularia spumigena* CCY9414, while filled circles and triangles illustrate the response ratio of *Nostoc* sp. 73.1 + DIN and without DIN respectively. Values represent mean  $\pm$  SD ( $n = 2$ ) after 14 days of incubation.



## Discussion

Rubisco, the enzyme responsible for fixing CO<sub>2</sub> during oxidative photosynthesis, evolved during the Archean, when atmospheric O<sub>2</sub> levels were non-existent. The increase in O<sub>2</sub> in the Earth's atmosphere, generally accepted to have been brought about by oxidative photosynthesis, is thought to have induced the evolution of the carbon concentrating mechanism to maintain the carboxylase and suppress the oxygenase activity of Rubisco (Rae, 2013). It is well known that cyanobacteria grow faster at elevated levels of CO<sub>2</sub> (e.g. (Hutchins *et al.*, 2007, Levitan *et al.*, 2007) as they are not reliant on the carbon concentrating mechanisms to maintain high levels of CO<sub>2</sub> around Rubisco, with some strains, being able to grow at 100% CO<sub>2</sub> (Thomas *et al.*, 2005). However, the effect of prolonged exposure to eCO<sub>2</sub> on the NP of cyanobacteria, particularly diazotrophic *Nostoc* and *Nodularia* species, is largely unknown. Our pilot study aimed at elucidating possible changes in NP rates in terrestrial and aquatic diazotrophic cyanobacteria species at near future eCO<sub>2</sub> levels and additionally measure differences in strain responses with respect to N<sub>2</sub> fixation and toxin production.

### Net primary production response to eCO<sub>2</sub>

All species and strains tested were able to quickly respond to elevated CO<sub>2</sub> in the gas exchange cuvette and instantly up-regulate their NP rates (C<sub>high</sub> vs C<sub>amb</sub>) as illustrated in the short term response graphs (Fig 1A) and the short term response ratios (Suppl. Figure 2A), except *N. harveyana* SAG44.5 at day 7. Cultures grown at eCO<sub>2</sub> showed an immediate reduction in NP efficiency when presented with CO<sub>2</sub> at PAL levels in the cuvette (Fig.1B). The lack of significant reduction in NP rates in cultures grown at eCO<sub>2</sub> and measured at 380 ppm CO<sub>2</sub> (T<sub>high</sub> vs T<sub>amb</sub>) in the cuvette (Suppl. Fig 2B) indicate that the cultures still invested in maintaining their carbon concentrating mechanism while growing at eCO<sub>2</sub> levels,

thereby enabling them to still maintain normal NP rates at PAL of CO<sub>2</sub>. Only *N. harveyana* SAG44.85 showed a significant difference in NP response rates between day 7 and day 14, with an apparently negative response in NP at eCO<sub>2</sub> on day 7.

Differences of long-term, 14 and 7 day responses (T<sub>high</sub>:C<sub>amb</sub>) are not as pronounced as the short term (T<sub>high</sub>:T<sub>amb</sub> & C<sub>high</sub>:C<sub>amb</sub>) and most visible in the strains grown in the presence of nitrate (Fig. 2). *Nostoc* strains grown under N limitation did not utilise the availability of eCO<sub>2</sub> to increase their NP rates as much as those grown without nitrogen limitation, presumably in an attempt to maintain a balanced C:N ratio.

The gas exchange measurements record the CO<sub>2</sub> taken up by the CO<sub>2</sub> receptors, NDH-I<sub>3</sub> and NDH-I<sub>4</sub>, so far identified in all cyanobacterial strains tested (Reviewed in (Price, 2011, Visser *et al.*, 2016). All CO<sub>2</sub> is converted to HCO<sub>3</sub><sup>-</sup> and transported into the CCM where it is converted back to CO<sub>2</sub> by carbonic anhydrase and is then available to bind to Rubisco. The fact that there was not a significant reduction in NP measured at PAL levels for cultures grown at eCO<sub>2</sub> (T<sub>amb</sub>) when compared to PAL measurements (C<sub>amb</sub>) of the control cultures (Fig. 1 A & B, Suppl. Table 3) suggests that the cyanobacteria maintained their CCM machinery, despite increased CO<sub>2</sub> availability. Of interest is that media acidification (Suppl. table 1) did not appear to affect NP rates as there were no significant differences between NP rates determined in control or treated cultures at the CO<sub>2</sub> levels tested (Fig. 1 A&B).

Production of the toxin nodularin by *N. spumigena*, *Nostoc* sp. 73.1 and *Nostoc* sp. 65.1 did not show any response to eCO<sub>2</sub>. On the other hand, nodularin production was correlated to increased POC:PON levels for *Nostoc* sp. 73.1. Here, elevated nodularin was observed in cultures with lower POC:PON ratios in presence of inorganic nitrate in contrast to *Nostoc* sp. 73.1 growing as a N<sub>2</sub> fixer. Likewise, the cyanobacterium *Microcystis aeruginosa* (non diazotrophic) is known to synthesize nitrogen-rich microcystin variants when exposed to excess N and eCO<sub>2</sub> (Van de Waal *et al.*, 2009).

## **N<sub>2</sub> fixation response to eCO<sub>2</sub>**

The negative yet not significant effect of acidification on N<sub>2</sub> fixation rates for *Nostoc* sp. 73.1 detected in our pilot study should be further investigated. On the other hand, *Nodularia* spp. tested were not inhibited by medium acidification and displayed stimulation at eCO<sub>2</sub> as published before (Wannicke *et al.*, 2012). This stimulation of N<sub>2</sub> fixation in *Nodularia* is not consistent among publications with studies reporting negative (Czerny *et al.*, 2009) or non-significant (Karlberg & Wulff, 2013) effect of eCO<sub>2</sub>. Whether this reflects their origin in an acidic aquatic environment in a period of elevated atmospheric CO<sub>2</sub> levels, remains to be determined.

Freshwater non-diazotrophic cyanobacteria were shown to benefit from increased HCO<sub>3</sub><sup>-</sup> in the media only if they carried the low specificity, high flux bicarbonate receptor, BicA (Sandrini *et al.*, 2016, Visser *et al.*, 2016) both published during the execution of this pilot study). As no genetic information is available for the terrestrial strains of *Nostoc* used in this study, nor for *N. harveyana* SAG44.85, we are unable to interpret the biological response to increased HCO<sub>3</sub><sup>-</sup>, neither within the context of NP nor N<sub>2</sub> fixation. Excess supply of both C and N is known to increase cellular N:C ratios (Van de Waal *et al.*, 2009). One would therefore expect an increase in N uptake under N-replete conditions or N<sub>2</sub> fixation in diazotrophs under N-limitation in cultures benefitting from eCO<sub>2</sub>. There appears to be a trend to increased N<sub>2</sub> fixation rates in *N. spumigena* CCY9414 (Fig. 3) under eCO<sub>2</sub> growth conditions, with a significant increase recorded for the benthic strain *N. harveyana* SAG44.85. *N. spumigena* CCY9414, for which genomic data is available, carries a gene (NSP\_RS09630) with 75% identity to the *BicA* gene of *M. aeruginosa* PCC7806, thereby suggesting that it can benefit from increased HCO<sub>3</sub><sup>-</sup> in the media and increase its NP rates accordingly. Interestingly, the increase in NP did not cause increased respiration (Suppl. Fig. 3), indicating that the cultures were not stressed under eCO<sub>2</sub> growth conditions and that Rubisco was not running at near substrate saturation (Price, 2011).

## Differences between cyanobacterial species

No matter what  $C_i$  is acquired by the cyanobacterium, only  $CO_2$  converted from  $HCO_3^-$  can serve as substrate for Rubisco. Aquatic environments are often severely limited by  $C_i$  availability owing to the poor diffusion of  $CO_2$  in water, and the slow equilibrium between  $CO_2$  and  $HCO_3^-$ , especially at neutral pH values. This historical difference in  $C_i$  availability is reflected in the responses of terrestrial *Nostoc* species, the bloom forming, surface dwelling *N. spumigena* CCY9414 and the benthic living *N. harveyana* SAG44.85 (Fig. 6). The latter displayed the weakest response towards  $eCO_2$  in the long term, but the highest increase in short- term response of NP at  $eCO_2$  in the gas exchange cuvette, suggesting an overall low expression of  $HCO_3^-$  receptors. In their natural benthic environment, elevated  $CO_2$  of up to 3000  $\mu\text{atm}$  can occur due to high organic matter decomposition and remineralisation (Haynert *et al.*, 2012). The capability to swiftly downregulate the CCM is an important prerequisite for attaining high  $CO_2$  tolerance in this environment.

*N. spumigena* CCY9414, being an aquatic surface dweller would be exposed to higher levels of  $C_i$  both in the water and from the air, thereby allowing for overall increased NP as seen in Fig. 1 when compared to NP of *N. harveyana* SAG44.85. The terrestrial *Nostoc* species used in this study are historically required to be more cautious in their growth as they were isolated from areas prone to long periods of desiccation (Gehring *et al.*, 2010). While rapidly responding to  $eCO_2$  with increased NP rates in both the short and long term (Figs. 1 & 2), they did not invest in the highly energy demanding process of  $N_2$  fixation (Fig. 3) under N limitation as heavily as the aquatic *Nodularia* species studied. The small increase in  $N_2$  fixation by *Nostoc* sp. 73.1 observed under  $eCO_2$  in this study may offer an explanation as to the overall reduction in cyanobacterial biomass observed in dryland soilcrusts exposed to  $eCO_2$  (Steven *et al.*, 2012). This negative effect of exposure to  $eCO_2$  highlights the complexity of dryland biocrust systems and their response to climate change (Reed *et al.*, 2016). The observed increase in expression of cyanobacterial genes related to oxidative stress (Steven *et al.*, 2012) should be taken into consideration in future studies exposing both terrestrial and aquatic cyanobacterial species to elevated levels of  $CO_2$ .

What is apparent from this pilot study is that there are clear strain specific differences in responding to eCO<sub>2</sub> levels in strains originating from benthic, pelagic and terrestrial environments, which likely induce changes in the community composition of not only fresh water and marine waters, but also the terrestrial sphere. Future investigations should focus on more clearly elucidating the response of Rubisco to raised atmospheric CO<sub>2</sub> levels in cyanobacterial strains for which we have complete genomic sequence information. Additionally, the factors governing the large differences in N<sub>2</sub> fixation rates observed between the *Nodularia* and *Nostoc* strains investigated in the pilot investigations, especially with respect to water acidification, should be further studied. Cyanobacteria have, from a historical perspective, survived numerous environmental challenges during their long lifespan on Earth. This study has shown that all the diazotrophic cyanobacteria investigated are able to immediately increase their NP rates in response to atmospheric eCO<sub>2</sub>, both in the short term and after 14 days exposure. Changes in NP responses to combined elevated CO<sub>2</sub> and HCO<sub>3</sub><sup>-</sup> availability should be assessed in future studies using strains for which we have genetic information pertaining to C<sub>i</sub> uptake receptors. The increased PON content and lower POC:PON ratios suggest that increased diazotrophic bloom occurrences will become normality under elevated atmospheric CO<sub>2</sub> levels up to 2000 ppm, the level investigated in this study. Further studies investigating C sequestration and N<sub>2</sub> fixation in a wider range of cyanobacterial primary producers from different ecological niches will assist in understanding the ecophysiological responses in fresh- and marine water systems, as well as terrestrial environments.

## **Acknowledgments**

N.Wannicke thankfully acknowledges the financial support by the Project BIOACID of the German Federal Ministry of Education and Research (BMBF, FKZ 03F0728F). M. Gehringer was partially funded by DFG GE 2558/3-1. We wish to convey our gratitude to B. Büdel, C. Colesie and E. Neuhaus (TU Kaiserslautern) for providing experimental facilities and expertise and E. Dittman, University of Potsdam for toxin analysis.

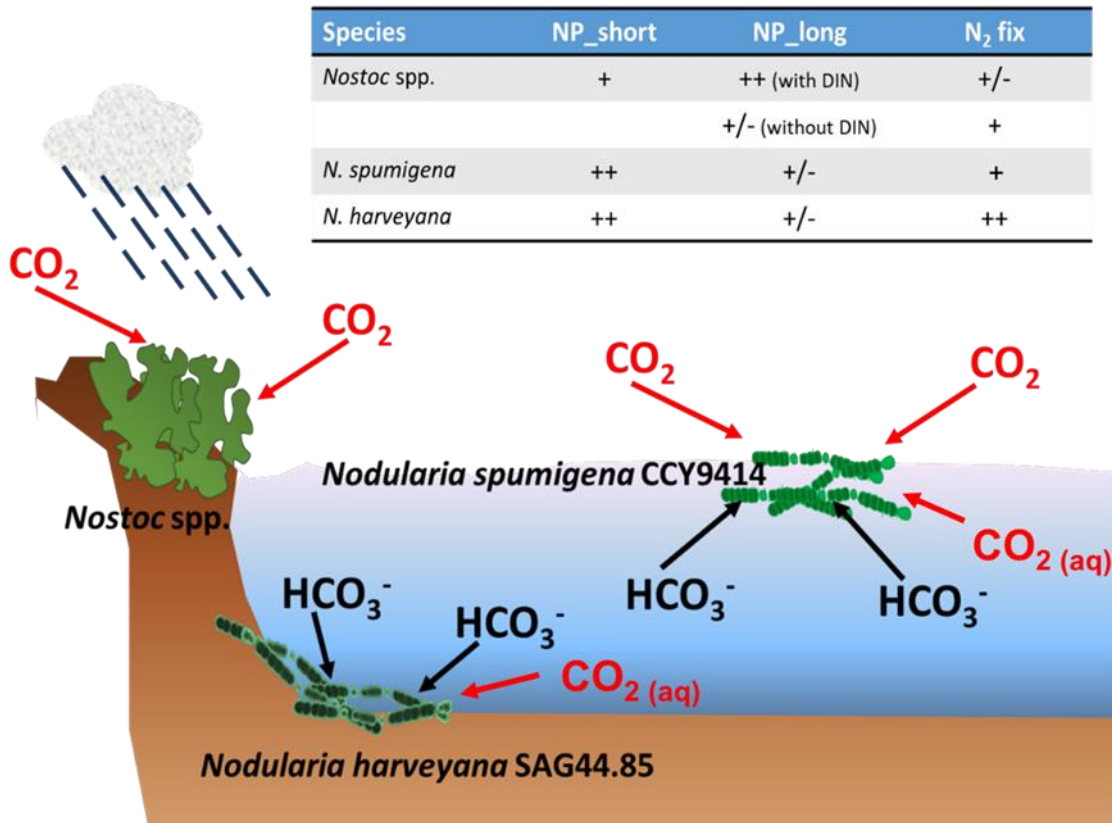

**Fig. 6 Ecological implications of eCO<sub>2</sub> on terrestrial, aquatic and benthic cyanobacteria species.** Terrestrial cyanobacterial net photosynthesis (NP) is primarily dependent on the availability of water, while aquatic species are generally restricted by N and P availability. All species can access CO<sub>2</sub> gas in the atmosphere or dissolved in water. The ability to benefit from increased HCO<sub>3</sub><sup>-</sup> availability, the result of increased atmospheric CO<sub>2</sub> in this study, is largely dependent on whether the species of cyanobacteria expresses the high flux, low specificity sodium dependent BicA carbonate transporter that would allow rapid uptake of HCO<sub>3</sub><sup>-</sup> from the water surrounding it. This study only assessed NP based on CO<sub>2</sub> uptake. Abbreviations: NP: net photosynthesis (short and long-term response), fix: fixation, DIN (dissolved inorganic nitrogen). Mathematic symbols in the table indicate response towards eCO<sub>2</sub> with +/- representing no response, + slight positive and ++ strong positive response.

## References

- Beversdorf LJ, Miller TR & McMahon KD (2013) The Role of Nitrogen Fixation in Cyanobacterial Bloom Toxicity in a Temperate, Eutrophic Lake. *Plos One* **8**.
- Bhargava S, Chouhan S, Kaithwas V & Maithil R (2013) Carbon dioxide regulation of autotrophy and diazotrophy in the nitrogen-fixing cyanobacterium *Nostoc muscorum*. *Ecotox Environ Safe* **98**: 345-351.
- Cardona T, Murray JW & Rutherford AW (2015) Origin and Evolution of Water Oxidation before the Last Common Ancestor of the Cyanobacteria. *Molecular Biology and Evolution* **32**: 1310-1328.
- Czerny J, Barcelos e Ramos J & Riebesell U (2009) Influence of elevated CO<sub>2</sub> concentrations on cell division and nitrogen fixation rates in the bloom-forming cyanobacterium *Nodularia spumigena*. *Biogeosciences (BG)* **6**: 1865-1875.
- Downing TG, Sember CS, Gehringer MM & Leukes W (2005) Medium N : P ratios and specific growth rate comodule microcystin and protein content in *Microcystis aeruginosa* PCC7806 and *M. Aeruginosa* UV027. *Microbial Ecol* **49**: 468-473.
- Eichner M, Rost B & Kranz SA (2014) Diversity of ocean acidification effects on marine N-2 fixers. *J Exp Mar Biol Ecol* **457**: 199-207.
- El-Shehawy R, Gorokhova E, Fernandez-Pinas F & del Campo FF (2012) Global warming and hepatotoxin production by cyanobacteria: What can we learn from experiments? *Water Research* **46**: 1420-1429.
- Falkowski P & Raven J (2007) Photosynthesis and primary production in nature. *Aquatic photosynthesis 2nd ed Princeton University Press, Princeton*.
- Gehringer MM (2004) Microcystin-LR and okadaic acid-induced cellular effects: A dualistic response. *FEBS Letters* **557**: 1-8.
- Gehringer MM & Wannicke N (2014) Climate change and regulation of hepatotoxin production in Cyanobacteria. *Fems Microbiol Ecol* **88**: 1-25.
- Gehringer MM, Pengelly J, Cuddy WS, Fieker C, Forster PI & Neilan BA (2010) Host selection of symbiotic cyanobacteria in 31 species of the Australian cycad genus: *Macrozamia* (Zamiaceae). *Molecular Plant-Microbe Interactions* **23**: 811-812.
- Gehringer MM, Adler L, Roberts AA, Moffitt MC, Mihali TK, Mills TJ, Fieker C & Neilan BA (2012) Nodularin, a cyanobacterial toxin, is synthesized in planta by symbiotic *Nostoc* sp. *The ISME journal* **6**: 1834-1847.



- Haynert K, Schönfeld J, Polovodova-Asteman I & Thomsen J (2012) The benthic foraminiferal community in a naturally CO<sub>2</sub>-rich coastal habitat in the southwestern Baltic Sea. *Biogeosciences (BG)* **9**: 4421-4440
- Horst GP, Sarnelle O, White JD, Hamilton SK, Kaul RB & Bressie JD (2014) Nitrogen availability increases the toxin quota of a harmful cyanobacterium, *Microcystis aeruginosa*. *Water Research* **54**: 188-198.
- Hutchins DA, Fu FX, Zhang Y, Warner ME, Feng Y, Portune K, Bernhardt PW & Mulholland MR (2007) CO<sub>2</sub> control of *Trichodesmium* N<sub>2</sub> fixation, photosynthesis, growth rates, and elemental ratios: Implications for past, present, and future ocean biogeochemistry. *Limnol Oceanogr* **52**: 1293-1304.
- Hutchins DA, Fu FX, Zhang Y, Warner ME, Feng Y, Portune K, Bernhardt PW & Mulholland MR (2007) CO<sub>2</sub> control of *Trichodesmium* N<sub>2</sub> fixation, photosynthesis, growth rates, and elemental ratios: Implications for past, present, and future ocean biogeochemistry. *Limnology and Oceanography* **52**: 1293-1304.
- Karlberg M & Wulff A (2013) Impact of temperature and species interaction on filamentous cyanobacteria may be more important than salinity and increased pCO<sub>2</sub> levels. *Mar Biol* **160**: 2063-2072.
- Kleinteich J, Wood SA, Küpper FC, Camacho A, Quesada A, Frickey T & Dietrich DR (2012) Temperature-related changes in polar cyanobacterial mat diversity and toxin production. *Nature Climate Change* **2**: 356-360.
- Kranz SA, Eichner M & Rost B (2011) Interactions between CCM and N<sub>2</sub> fixation in *Trichodesmium*. *Photosynth Res* **109**: 73-84.
- Lane RW, Menon M, McQuaid JB, Adams DG, Thomas AD, Hoon SR & Dougill AJ (2013) Laboratory analysis of the effects of elevated atmospheric carbon dioxide on respiration in biological soil crusts. *J Arid Environ* **98**: 52-59.
- Levitan O, Rosenberg G, Setlik I, Setlikova E, Grigel J, Klepetar J, Prasil O & Berman-Frank I (2007) Elevated CO<sub>2</sub> enhances nitrogen fixation and growth in the marine cyanobacterium *Trichodesmium*. *Global Change Biol* **13**: 531-538.
- Lewis CE, Causton DR, Peratoner G, Cairns AJ & Foyer CH (1998) Acclimation of *Lolium temulentum* to growth at elevated CO<sub>2</sub>. *Photosynthesis: Mechanisms and Effects, Vols I-V* 4035-4038.
- Liu J, Van Oosterhout E, Faassen EJ, Lurling M, Helmsing NR & Van de Waal DB (2016) Elevated pCO<sub>2</sub> causes a shift towards more toxic microcystin variants in nitrogen-limited *Microcystis aeruginosa*. *Fems Microbiol Ecol* **92**, fiv159.



- Lyons TW, Reinhard CT & Planavsky NJ (2014) The rise of oxygen in Earth's early ocean and atmosphere. *Nature* **506**: 307-315.
- Meeks JC & Castenholz RW (1971) Growth and Photosynthesis in an Extreme Thermophile, *Synechococcus-Lividus* (Cyanophyta). *Arch Mikrobiol* **78**: 25-41.
- Mohr W, Grosskopf T, Wallace DWR & LaRoche J (2010) Methodological Underestimation of Oceanic Nitrogen Fixation Rates. *Plos One* **5**.
- Montoya JP, Voss M, Kahler P & Capone DG (1996) A simple, high-precision, high-sensitivity tracer assay for N-2 fixation. *Appl Environ Microb* **62**: 986-993.
- Neilan BA, Pearson LA, Muenchhoff J, Moffitt MC & Dittmann E (2013) Environmental conditions that influence toxin biosynthesis in cyanobacteria. *Environ Microbiol* **15**: 1239-1253.
- Paerl HW & Huisman J (2009) Climate change: a catalyst for global expansion of harmful cyanobacterial blooms. *Environ Microbiol Rep* **1**: 27-37.
- Paerl HW & Huisman J (2009) Climate change: a catalyst for global expansion of harmful cyanobacterial blooms. *Env Microbiol Rep* **1**: 27-37.
- Posch T, Köster O, Salcher MM & Pernthaler J (2012) Harmful filamentous cyanobacteria favoured by reduced water turnover with lake warming. *Nature Climate Change* **2**: 809-813.
- Price GD (2011) Inorganic carbon transporters of the cyanobacterial CO<sub>2</sub> concentrating mechanism. *Photosynth Res* **109**: 47-57.
- Reed SC, Maestre FT, Ochoa-Hueso R, Kuske CR, Darrouzet-Nardi A, Oliver M, Darby B, Sancho LG, Sinsabaugh RL & Belnap J (2016) Biocrusts in the Context of Global Change. *Biological Soil Crusts: An Organizing Principle in Drylands*, (Weber B, Büdel B & Belnap J, eds.), pp. 451-476. Springer International Publishing, Cham.
- Sanchez-Baracaldo P (2015) Origin of marine planktonic cyanobacteria. *Sci Rep-Uk* **5**.
- Sandrini G, Jakupovic D, Matthijs HCP & Huisman J (2015) Strains of the Harmful Cyanobacterium *Microcystis aeruginosa* Differ in Gene Expression and Activity of Inorganic Carbon Uptake Systems at Elevated CO<sub>2</sub> Levels. *Appl Environ Microb* **81**: 7730-7739.
- Sandrini G, Ji X, Verspagen JMH, Tann RP, Slot PC, Luimstra VM, Schuurmans JM, Matthijs HCP & Huisman J (2016) Rapid adaptation of harmful cyanobacteria to rising CO<sub>2</sub>. *P Natl Acad Sci USA* **113**: 9315-9320.
- Sevilla E, Martin-Luna B, Bes MT, Fillat MF & Peleato ML (2012) An active photosynthetic electron transfer chain required for *mcyD* transcription and microcystin synthesis in *Microcystis aeruginosa* PCC7806. *Ecotoxicology* **21**: 811-819.

- Shi D, Kranz SA, Kim JM & Morel FMM (2012) Ocean acidification slows nitrogen fixation and growth in the dominant diazotroph *Trichodesmium* under low-iron conditions. *P Natl Acad Sci USA* **109**: E3094-E3100.
- Steven B, Gallegos-Graves L, Yeager CM, Belnap J, Evans RD & Kuske CR (2012) Dryland biological soil crust cyanobacteria show unexpected decreases in abundance under long-term elevated CO<sub>2</sub>. *Environ Microbiol* **14**: 3247-3258.
- Thomas DJ, Sullivan SL, Price AL & Zimmerman SM (2005) Common freshwater cyanobacteria grow in 100% CO<sub>2</sub>. *Astrobiology* **5**: 66-74.
- Van de Waal DB, Verspagen JMH, Lurling M, Van Donk E, Visser PM & Huisman J (2009) The ecological stoichiometry of toxins produced by harmful cyanobacteria: an experimental test of the carbon-nutrient balance hypothesis. *Ecology Letters* **12**: 1326-1335.
- Van de Waal DB, Verspagen JM, Lüring M, Van Donk E, Visser PM & Huisman J (2009) The ecological stoichiometry of toxins produced by harmful cyanobacteria: an experimental test of the carbon-nutrient balance hypothesis. *Ecology letters* **12**: 1326-1335.
- Van De Waal DB, Verspagen JMH, Finke JF, *et al.* (2011) Reversal in competitive dominance of a toxic versus non-toxic cyanobacterium in response to rising CO<sub>2</sub>. *Isme J* **5**: 1438-1450.
- Verschoor AM, Van Dijk MA, Huisman J & Van Donk E (2013) Elevated CO<sub>2</sub> concentrations affect the elemental stoichiometry and species composition of an experimental phytoplankton community. *Freshwater Biol* **58**: 597-611.
- Visser PM, Verspagen JMH, Sandrini G, Stal LJ, Matthijs HCP, Davis TW, Paerl HW & Huisman J (2016) How rising CO<sub>2</sub> and global warming may stimulate harmful cyanobacterial blooms. *Harmful Algae* **54**: 145-159.
- Voss B, Bolhuis H, Fewer DP, *et al.* (2013) Insights into the Physiology and Ecology of the Brackish-Water-Adapted Cyanobacterium *Nodularia spumigena* CCY9414 Based on a Genome-Transcriptome Analysis. *Plos One* **8**.
- Wannicke N, Endres S, Engel A, Grossart HP, Nausch M, Unger J & Voss M (2012) Response of *Nodularia spumigena* to pCO<sub>2</sub> - Part 1: Growth, production and nitrogen cycling. *Biogeosciences* **9**: 2973-2988.
- Wannicke N, Endres S, Engel A, Grossart HP, Nausch M, Unger J & Voss M (2012) Response of *Nodularia spumigena* to pCO<sub>2</sub> - Part 1: Growth, production and nitrogen cycling. *Biogeosciences* **9**: 2973-2988.
- Weiss MC, Sousa FL, Mrnjavac N, Neukirchen S, Roettger M, Nelson-Sathi S & Martin WF (2016) The physiology and habitat of the last universal common ancestor. *Nat Microbiol* **1**, article 16116.

**Supplemental Table 1:** Carbonate chemistry parameter from the cultures after 14 days of experiment either measured or calculated using CO2SYS. Statistical significant differences between the two CO<sub>2</sub> treatments are indicated by \* for p < 0.05 (Student's t-test, two-tailed). Abbreviations: A<sub>T</sub> total alkalinity, C<sub>T</sub> total carbon.

| Species          | Growth media | CO <sub>2</sub> treatment | pH measured | A <sub>T</sub> measured<br>[μmol/kg] | C <sub>T</sub> calculated<br>[μmol/kg] | pCO <sub>2</sub> calculated<br>[μatm] |
|------------------|--------------|---------------------------|-------------|--------------------------------------|----------------------------------------|---------------------------------------|
| <i>Nostoc</i>    | BG110        | PAL (380 ppm)             | 7.85± 0.06* | 561± 5                               | 504±1 *                                | 293± 38*                              |
| <i>Nodularia</i> | F/2          | PAL (380 ppm)             | 7.85± 0.05* | 455± 1                               | 398±3 *                                | 232± 26*                              |
| <i>Nostoc</i>    | BG110        | eCO <sub>2</sub> (2000)   | 7.05± 0.01* | 565±6                                | 594±5 *                                | 1987±42*                              |
| <i>Nodularia</i> | F/2          | eCO <sub>2</sub> (2000)   | 7.02± 0.02* | 453± 2                               | 473±4 *                                | 1701± 83*                             |

**Supplemental Table 2:** Statistical results from the two-way repeated measures ANOVA testing the short- term pCO<sub>2</sub> effects (380 ppm and 1000 ppm) and the interaction with time (sampling day 7 and 14) on net photosynthesis under the two growth conditions PAL (380 ppm) and eCO<sub>2</sub> (2000 ppm). Significant differences (p≤0.05) marked in bold. m.s. missing value. n= 4, DF = 1.

| Treatment        | Predictor              |   | <i>Nostoc</i><br>65.1<br>+DIN | <i>Nostoc</i><br>73.1<br>+DIN | <i>Nostoc</i><br>C1.8<br>+DIN | <i>Nostoc</i><br>73.1 | <i>Nostoc</i><br>C1.8 | <i>Nodularia</i><br><i>spumigena</i> | <i>Nodularia</i><br><i>harveyana</i> |
|------------------|------------------------|---|-------------------------------|-------------------------------|-------------------------------|-----------------------|-----------------------|--------------------------------------|--------------------------------------|
| PAL              | CO <sub>2</sub>        | F | 42.08                         | 13.38                         | 4.77                          | 1.813                 | 37.72                 | 3.69                                 | 6.62                                 |
|                  |                        | p | <b>0.023</b>                  | 0.067                         | 0.16                          | 0.310                 | <b>0.025</b>          | 0.194                                | 0.124                                |
|                  | Time                   | F | 0.21                          | 0.241                         | 2.97                          | 3.074                 | 0.386                 | 19.38                                | 6.55                                 |
|                  |                        | p | 0.692                         | 0.672                         | 0.232                         | 0.222                 | 0.598                 | <b>0.048</b>                         | 0.125                                |
|                  | CO <sub>2</sub> x Time | F | 1.00                          | 0.091                         | 0.026                         | 0.739                 | 0.084                 | 24.75                                | 11.92                                |
|                  |                        | p | 0.423                         | 0.792                         | 0.887                         | 0.481                 | 0.799                 | <b>0.038</b>                         | 0.075                                |
| eCO <sub>2</sub> | CO <sub>2</sub>        | F | 486.5                         | 155.1                         | 1.29                          | 120.35                | 87.8                  | m.s                                  | 0.159                                |
|                  |                        | p | <b>0.002</b>                  | <b>0.006</b>                  | 0.459                         | <b>0.008</b>          | <b>0.011</b>          |                                      | 0.799                                |
|                  | Time                   | F | 0.381                         | 0.303                         | 575                           | 34.42                 | 2.85                  | m.s                                  | 6.01                                 |
|                  |                        | p | 0.607                         | 0.631                         | <b>0.027</b>                  | <b>0.028</b>          | 0.232                 |                                      | 0.134                                |
|                  | CO <sub>2</sub> x time | F | 1.09                          | 12.68                         | 31.9                          | 25.15                 | 1.007                 | m.s                                  | 9.46                                 |
|                  |                        | p | 0.406                         | 0.071                         | 0.111                         | <b>0.038</b>          | 0.421                 |                                      | 0.091                                |

**Supplemental Table 3:** Spearman's Rho correlation coefficients among study variables. Significant correlations are denoted with asterisks at significance level \* $p < 0.05$  and \*\* $p < 0.01$  in bold numbers. Abbreviations are Chla-chlorophyll a, N<sub>2</sub>fix- N<sub>2</sub> fixation, PAL-present atmospheric levels, PON-particulate organic nitrogen, POC – particulate organic carbon, eCO<sub>2</sub> – elevated CO<sub>2</sub>.

|                                      |                | Nitrogen       | pcCO <sub>2</sub> | Chla           | PAL_Dark<br>respiration | PAL_net<br>photosynthesis | eCO <sub>2</sub> _Dark<br>respiration | eCO <sub>2</sub> _net<br>photosynthesis | Total_cellular_<br>nodularin_per Chla | PON            | POC           | POC:PON        | N <sub>2</sub> fixation<br>[per L] | N <sub>2</sub> fixation<br>[per PON] |
|--------------------------------------|----------------|----------------|-------------------|----------------|-------------------------|---------------------------|---------------------------------------|-----------------------------------------|---------------------------------------|----------------|---------------|----------------|------------------------------------|--------------------------------------|
| Nitrogen                             | Spearman's Rho |                |                   | <b>-.376**</b> | <b>-.389**</b>          | .088                      | -.214                                 | -.218                                   | -.064                                 | <b>-.658**</b> | -.407         | .376           |                                    |                                      |
|                                      | p (two tailed) |                |                   | .002           | .002                    | .489                      | .097                                  | .092                                    | .620                                  | .006           | .118          | .152           | .001                               | .001                                 |
|                                      | N              | 64             | 12                | 64             | 63                      | 64                        | 61                                    | 61                                      | 63                                    | 16             | 16            | 16             | 16                                 | 16                                   |
| pcCO <sub>2</sub>                    | Spearman's Rho |                | 1.000             | <b>-.643*</b>  | -.510                   | .259                      | -.294                                 | -.084                                   | .441                                  | .168           | .182          | .217           | -.147                              | -.483                                |
|                                      | p (two tailed) |                |                   | .024           | .090                    | .417                      | .354                                  | .795                                    | .151                                  | .602           | .572          | .499           | .649                               | .112                                 |
|                                      | N              | 12             | 12                | 12             | 12                      | 12                        | 12                                    | 12                                      | 12                                    | 12             | 12            | 12             | 12                                 | 12                                   |
| Chla                                 | Spearman's Rho | <b>-.376**</b> | <b>-.643*</b>     | 1.000          | <b>.716**</b>           | <b>-.700**</b>            | <b>.714**</b>                         | <b>-.733**</b>                          | <b>-.363**</b>                        | .426           | .147          | <b>-.659**</b> | <b>.633**</b>                      | <b>.701**</b>                        |
|                                      | p (two tailed) | .002           | .024              |                | .000                    | .000                      | .000                                  | .000                                    | .003                                  | .099           | .587          | .006           | .009                               | .003                                 |
|                                      | N              | 64             | 12                | 64             | 63                      | 64                        | 61                                    | 61                                      | 63                                    | 16             | 16            | 16             | 16                                 | 16                                   |
| PAL_Dark respiration                 | Spearman's Rho | <b>-.389**</b> | -.510             | <b>.716**</b>  | 1.000                   | <b>-.596**</b>            | <b>.615**</b>                         | <b>-.614**</b>                          | <b>-.439**</b>                        | .482           | .238          | <b>-.553*</b>  | <b>.624**</b>                      | <b>.689**</b>                        |
|                                      | p (two tailed) | .002           | .090              | .000           |                         | .000                      | .000                                  | .000                                    | .000                                  | .058           | .374          | .026           | .010                               | .003                                 |
|                                      | N              | 63             | 12                | 63             | 63                      | 63                        | 61                                    | 61                                      | 62                                    | 16             | 16            | 16             | 16                                 | 16                                   |
| PAL_net photosynthesis               | Spearman's Rho | .088           | .259              | <b>-.700**</b> | <b>-.596**</b>          | 1.000                     | <b>-.602**</b>                        | <b>.585**</b>                           | .101                                  | <b>-.694**</b> | <b>-.500*</b> | <b>.582*</b>   | <b>-.809**</b>                     | <b>-.650**</b>                       |
|                                      | p (two tailed) | .489           | .417              | .000           | .000                    |                           | .000                                  | .000                                    | .430                                  | .003           | .049          | .018           | .000                               | .006                                 |
|                                      | N              | 64             | 12                | 64             | 63                      | 64                        | 61                                    | 61                                      | 63                                    | 16             | 16            | 16             | 16                                 | 16                                   |
| eCO <sub>2</sub> _Dark respiration   | Spearman's Rho | -.214          | -.294             | <b>.714**</b>  | <b>.615**</b>           | <b>-.602**</b>            | 1.000                                 | <b>-.660**</b>                          | <b>-.498**</b>                        | .385           | .150          | -.479          | <b>.580*</b>                       | <b>.633**</b>                        |
|                                      | p (two tailed) | .097           | .354              | .000           | .000                    | .000                      |                                       | .000                                    | .000                                  | .141           | .579          | .060           | .019                               | .009                                 |
|                                      | N              | 61             | 12                | 61             | 61                      | 61                        | 61                                    | 61                                      | 60                                    | 16             | 16            | 16             | 16                                 | 16                                   |
| eCO <sub>2</sub> _net photosynthesis | Spearman's Rho | .218           | -.084             | <b>-.733**</b> | <b>-.614**</b>          | <b>.585**</b>             | <b>-.660**</b>                        | 1.000                                   | <b>.551**</b>                         | -.174          | .109          | .474           | -.224                              | -.291                                |
|                                      | p (two tailed) | .092           | .795              | .000           | .000                    | .000                      | .000                                  |                                         | .000                                  | .520           | .688          | .064           | .405                               | .274                                 |
|                                      | N              | 61             | 12                | 61             | 61                      | 61                        | 61                                    | 61                                      | 60                                    | 16             | 16            | 16             | 16                                 | 16                                   |
| Total_cellular_nodularin_per Chla    | Spearman's Rho | -.064          | .441              | <b>-.363**</b> | <b>-.439**</b>          | .101                      | <b>-.498**</b>                        | <b>.551**</b>                           | 1.000                                 | -.052          | .227          | <b>.546*</b>   | .014                               | -.101                                |
|                                      | p (two tailed) | .620           | .151              | .003           | .000                    | .430                      | .000                                  | .000                                    |                                       | .853           | .416          | .035           | .959                               | .720                                 |
|                                      | N              | 63             | 12                | 63             | 62                      | 63                        | 60                                    | 60                                      | 63                                    | 15             | 15            | 15             | 15                                 | 15                                   |
| PON                                  | Spearman's Rho | <b>-.658**</b> | .168              | .426           | .482                    | <b>-.694**</b>            | .385                                  | -.174                                   | -.052                                 | 1.000          | <b>.888**</b> | -.397          | <b>.846**</b>                      | <b>.511*</b>                         |
|                                      | p (two tailed) | .006           | .602              | .099           | .058                    | .003                      | .141                                  | .520                                    | .853                                  |                | .000          | .128           | .000                               | .043                                 |
|                                      | N              | 16             | 12                | 16             | 16                      | 16                        | 16                                    | 16                                      | 15                                    | 16             | 16            | 16             | 16                                 | 16                                   |
| POC                                  | Spearman's Rho | -.407          | .182              | .147           | .238                    | <b>-.500*</b>             | .150                                  | .109                                    | .227                                  | <b>.888**</b>  | 1.000         | 0.000          | <b>.667**</b>                      | .246                                 |
|                                      | p (two tailed) | .118           | .572              | .587           | .374                    | .049                      | .579                                  | .688                                    | .416                                  | .000           |               | 1.000          | .005                               | .359                                 |
|                                      | N              | 16             | 12                | 16             | 16                      | 16                        | 16                                    | 16                                      | 15                                    | 16             | 16            | 16             | 16                                 | 16                                   |
| POC:PON                              | Spearman's Rho | .376           | .217              | <b>-.659**</b> | <b>-.553*</b>           | <b>.582*</b>              | -.479                                 | .474                                    | <b>.546*</b>                          | -.397          | 0.000         | 1.000          | <b>-.525*</b>                      | <b>-.570*</b>                        |
|                                      | p (two tailed) | .152           | .499              | .006           | .026                    | .018                      | .060                                  | .064                                    | .035                                  | .128           | 1.000         |                | .037                               | .021                                 |
|                                      | N              | 16             | 12                | 16             | 16                      | 16                        | 16                                    | 16                                      | 15                                    | 16             | 16            | 16             | 16                                 | 16                                   |
| N <sub>2</sub> fixation [per L]      | Spearman's Rho | <b>-.752**</b> | -.147             | <b>.633**</b>  | <b>.624**</b>           | <b>-.809**</b>            | <b>.580*</b>                          | -.224                                   | .014                                  | <b>.846**</b>  | <b>.667**</b> | <b>-.525*</b>  | 1.000                              | <b>.847**</b>                        |
|                                      | p (two tailed) | .001           | .649              | .009           | .010                    | .000                      | .019                                  | .405                                    | .959                                  | .000           | .005          | .037           |                                    | .000                                 |
|                                      | N              | 16             | 12                | 16             | 16                      | 16                        | 16                                    | 16                                      | 15                                    | 16             | 16            | 16             | 16                                 | 16                                   |
| N <sub>2</sub> fixation [per PON]    | Spearman's Rho | <b>-.752**</b> | -.483             | <b>.701**</b>  | <b>.689**</b>           | <b>-.650**</b>            | <b>.633**</b>                         | -.291                                   | -.101                                 | <b>.511*</b>   | .246          | <b>-.570*</b>  | <b>.847**</b>                      | 1.000                                |
|                                      | p (two tailed) | .001           | .112              | .003           | .003                    | .006                      | .009                                  | .274                                    | .720                                  | .043           | .359          | .021           | .000                               |                                      |
|                                      | N              | 16             | 12                | 16             | 16                      | 16                        | 16                                    | 16                                      | 15                                    | 16             | 16            | 16             | 16                                 | 16                                   |

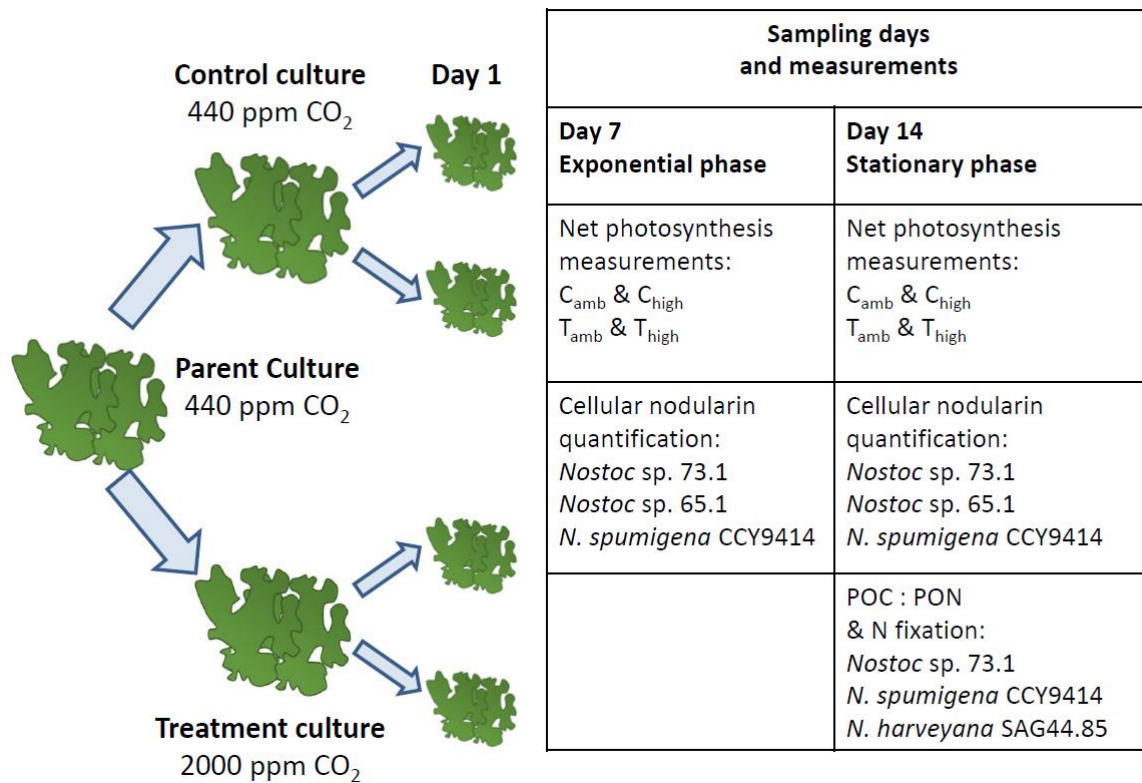

**Supplemental Figure 1:** Diagram illustrating the experimental flow.

Parent cultures grown under PAL conditions were divided into two batches 14 days prior to the start of the experiment to allow for acclimation to the elevated CO<sub>2</sub> levels. These cultures were used as inocula for the experimental cultures and processed as indicated and described in the main text.

**Supplemental Figure 2:** Short term response of net photosynthesis for the different species tested. The lnRR (natural-log transformed) was calculated from the quotient of the net photosynthesis (NP) rate of  $C_{high}$  by that of  $C_{amb}$  (A). In (B), the lnRR of  $T_{high}$  divided by the NP rates of  $T_{amb}$  is plotted. The lnRR data is presented calculated from the means and standard deviations of days 7 and 14,  $n=2$  respectively. The horizontal grey line indicates a lack of response to the  $eCO_2$  treatment (i.e. lnRR = 0).  $C_{high}$  readings for day 7 for *N. spumigena* PCC9414 were erratic and not included in the analysis.

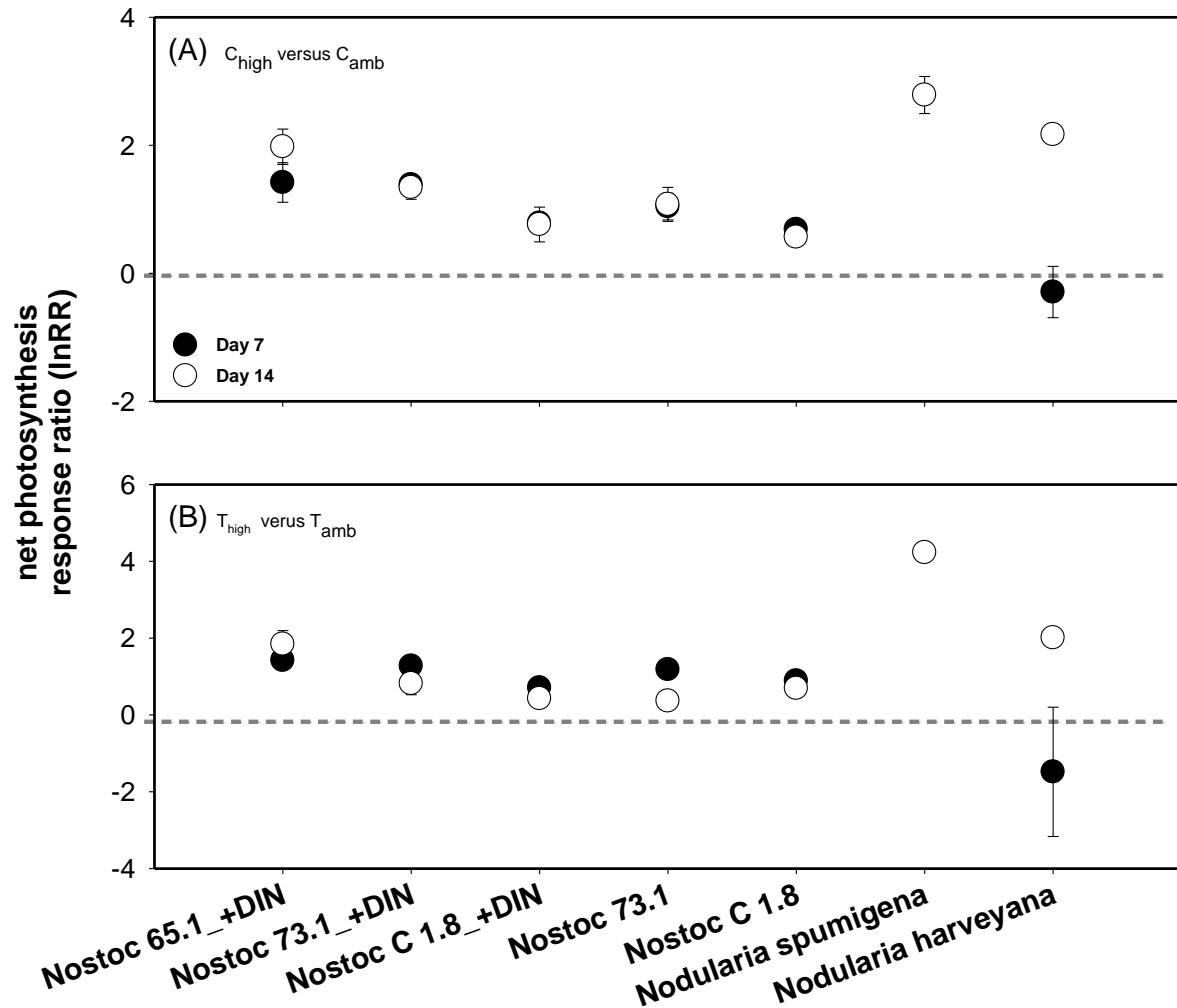

**Supplemental Figure 3:** Short term acclimation responses of dark respiration rates of cultures (A) grown at PAL and (B) grown at eCO<sub>2</sub>. NP measured under PAL (white bars) and eCO<sub>2</sub> (grey bars). Bars represent the mean and standard deviation of n=4 (days 7+ 14).

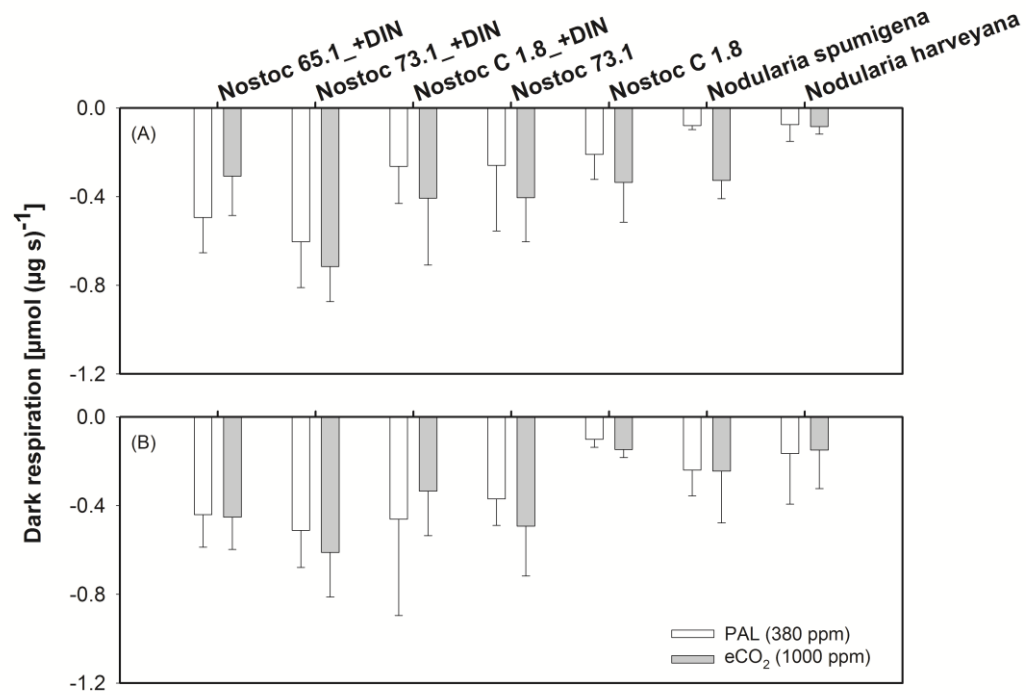

Source: https://www.biorxiv.org/content/10.1101/203869v1.full.pdf
